# Supplementary material for: Patterns of peritoneal dissemination and response to systemic chemotherapy in common and rare peritoneal tumors treated by cytoreductive surgery: Study protocol of a prospective, multi-center, observational study
Source: bioRxiv or medRxiv preprint supplement (doi:10.1101/2021.04.01.21254760), 2021-04-07
Supplement: Supplementary file [file media-3.pdf]

### Supplement 3

Surgical PCI (Select the structure with the largest tumor deposit in the region)

| Region | Structure                                                                                                                                                                                                                                                                                                                              | Morphology (select any one)                                                                                                                                                                                                                                                            | Lesion score                                                                                                         |
|--------|----------------------------------------------------------------------------------------------------------------------------------------------------------------------------------------------------------------------------------------------------------------------------------------------------------------------------------------|----------------------------------------------------------------------------------------------------------------------------------------------------------------------------------------------------------------------------------------------------------------------------------------|----------------------------------------------------------------------------------------------------------------------|
| 0      | Midline incision <input type="checkbox"/><br>Anterior parietal peritoneum <input type="checkbox"/><br>Greater omentum <input type="checkbox"/><br>Omental cake <input type="checkbox"/><br>Transverse colon <input type="checkbox"/><br>Gastrocolic ligament <input type="checkbox"/><br>Transverse mesocolon <input type="checkbox"/> | Tumour nodule <input type="checkbox"/><br>Confluent nodules <input type="checkbox"/><br>Plaque <input type="checkbox"/><br>Thickening <input type="checkbox"/><br>Scarring <input type="checkbox"/><br>Adhesion <input type="checkbox"/><br>Normal peritoneum <input type="checkbox"/> | 0 <input type="checkbox"/><br>1 <input type="checkbox"/><br>2 <input type="checkbox"/><br>3 <input type="checkbox"/> |
| 1      | Right hepatic lobe surface <input type="checkbox"/><br>Diaphragm <input type="checkbox"/><br>Foramen of Winslow <input type="checkbox"/><br>Gallbladder <input type="checkbox"/><br>Hepatorenal recess <input type="checkbox"/>                                                                                                        | Tumour nodule <input type="checkbox"/><br>Confluent nodules <input type="checkbox"/><br>Plaque <input type="checkbox"/><br>Thickening <input type="checkbox"/><br>Scarring <input type="checkbox"/><br>Adhesion <input type="checkbox"/><br>Normal peritoneum <input type="checkbox"/> | 0 <input type="checkbox"/><br>1 <input type="checkbox"/><br>2 <input type="checkbox"/><br>3 <input type="checkbox"/> |
| 2      | Left hepatic lobe surface <input type="checkbox"/><br>Lesser omentum <input type="checkbox"/><br>Hepatic hilum <input type="checkbox"/><br>Falciform ligament <input type="checkbox"/>                                                                                                                                                 | Tumour nodule <input type="checkbox"/><br>Confluent nodules <input type="checkbox"/><br>Plaque <input type="checkbox"/><br>Thickening <input type="checkbox"/><br>Scarring <input type="checkbox"/><br>Adhesion <input type="checkbox"/><br>Normal peritoneum <input type="checkbox"/> | 0 <input type="checkbox"/><br>1 <input type="checkbox"/><br>2 <input type="checkbox"/><br>3 <input type="checkbox"/> |
| 3      | Surface of spleen <input type="checkbox"/><br>Left diaphragmatic peritoneum <input type="checkbox"/><br>Tail of pancreas and hilum of the spleen <input type="checkbox"/><br>Anterior and posterior stomach surfaces <input type="checkbox"/>                                                                                          | Tumour nodule <input type="checkbox"/><br>Confluent nodules <input type="checkbox"/><br>Plaque <input type="checkbox"/><br>Thickening <input type="checkbox"/><br>Scarring <input type="checkbox"/><br>Adhesion <input type="checkbox"/><br>Normal peritoneum <input type="checkbox"/> | 0 <input type="checkbox"/><br>1 <input type="checkbox"/><br>2 <input type="checkbox"/><br>3 <input type="checkbox"/> |
| 4      | Left colon <input type="checkbox"/><br>Left paracolic gutter <input type="checkbox"/><br>Left mesocolon <input type="checkbox"/>                                                                                                                                                                                                       | Tumour nodule <input type="checkbox"/><br>Confluent nodules <input type="checkbox"/><br>Plaque <input type="checkbox"/><br>Thickening <input type="checkbox"/><br>Scarring <input type="checkbox"/><br>Adhesion <input type="checkbox"/><br>Normal peritoneum <input type="checkbox"/> | 0 <input type="checkbox"/><br>1 <input type="checkbox"/><br>2 <input type="checkbox"/><br>3 <input type="checkbox"/> |
| 5      | Left pelvic peritoneum <input type="checkbox"/><br>Secondary root of the mesosigmoid <input type="checkbox"/><br>Sigmoid colon <input type="checkbox"/>                                                                                                                                                                                | Tumour nodule <input type="checkbox"/><br>Confluent nodules <input type="checkbox"/><br>Plaque <input type="checkbox"/><br>Thickening <input type="checkbox"/><br>Scarring <input type="checkbox"/><br>Adhesion <input type="checkbox"/><br>Normal peritoneum <input type="checkbox"/> | 0 <input type="checkbox"/><br>1 <input type="checkbox"/><br>2 <input type="checkbox"/><br>3 <input type="checkbox"/> |
| 6      | Uterus <input type="checkbox"/><br>Left Fallopian tube <input type="checkbox"/><br>Right Fallopian tube <input type="checkbox"/><br>Left ovary <input type="checkbox"/>                                                                                                                                                                | Tumour nodule <input type="checkbox"/><br>Confluent nodules <input type="checkbox"/><br>Plaque <input type="checkbox"/><br>Thickening <input type="checkbox"/>                                                                                                                         | 0 <input type="checkbox"/><br>1 <input type="checkbox"/><br>2 <input type="checkbox"/><br>3 <input type="checkbox"/> |

|    |                                                                                                                                                                         |                                                                                                                                                                                                                                                                                        |                                                                                                                      |
|----|-------------------------------------------------------------------------------------------------------------------------------------------------------------------------|----------------------------------------------------------------------------------------------------------------------------------------------------------------------------------------------------------------------------------------------------------------------------------------|----------------------------------------------------------------------------------------------------------------------|
|    | Right ovary <input type="checkbox"/><br>Bladder <input type="checkbox"/><br>Pouch of Douglas <input type="checkbox"/><br>Rectosigmoid junction <input type="checkbox"/> | Scarring <input type="checkbox"/><br>Adhesion <input type="checkbox"/><br>Normal peritoneum <input type="checkbox"/>                                                                                                                                                                   |                                                                                                                      |
| 7  | Right pelvic peritoneum <input type="checkbox"/><br>Cecum <input type="checkbox"/><br>Appendix <input type="checkbox"/><br>Mesoappendix <input type="checkbox"/>        | Tumour nodule <input type="checkbox"/><br>Confluent nodules <input type="checkbox"/><br>Plaque <input type="checkbox"/><br>Thickening <input type="checkbox"/><br>Scarring <input type="checkbox"/><br>Adhesion <input type="checkbox"/><br>Normal peritoneum <input type="checkbox"/> | 0 <input type="checkbox"/><br>1 <input type="checkbox"/><br>2 <input type="checkbox"/><br>3 <input type="checkbox"/> |
| 8  | Right colon <input type="checkbox"/><br>Right paracolic gutter <input type="checkbox"/><br>Right mesocolon <input type="checkbox"/>                                     | Tumour nodule <input type="checkbox"/><br>Confluent nodules <input type="checkbox"/><br>Plaque <input type="checkbox"/><br>Thickening <input type="checkbox"/><br>Scarring <input type="checkbox"/><br>Adhesion <input type="checkbox"/><br>Normal peritoneum <input type="checkbox"/> | 0 <input type="checkbox"/><br>1 <input type="checkbox"/><br>2 <input type="checkbox"/><br>3 <input type="checkbox"/> |
| 9  | Proximal jejunum <input type="checkbox"/><br>Proximal mesojejunum <input type="checkbox"/>                                                                              | Tumour nodule <input type="checkbox"/><br>Confluent nodules <input type="checkbox"/><br>Plaque <input type="checkbox"/><br>Thickening <input type="checkbox"/><br>Scarring <input type="checkbox"/><br>Adhesion <input type="checkbox"/><br>Normal peritoneum <input type="checkbox"/> | 0 <input type="checkbox"/><br>1 <input type="checkbox"/><br>2 <input type="checkbox"/><br>3 <input type="checkbox"/> |
| 10 | Distal jejunum <input type="checkbox"/><br>Distal mesojejunum <input type="checkbox"/>                                                                                  | Tumour nodule <input type="checkbox"/><br>Confluent nodules <input type="checkbox"/><br>Plaque <input type="checkbox"/><br>Thickening <input type="checkbox"/><br>Scarring <input type="checkbox"/><br>Adhesion <input type="checkbox"/><br>Normal peritoneum <input type="checkbox"/> | 0 <input type="checkbox"/><br>1 <input type="checkbox"/><br>2 <input type="checkbox"/><br>3 <input type="checkbox"/> |
| 11 | Proximal ileum <input type="checkbox"/><br>Proximal mesoileum <input type="checkbox"/>                                                                                  | Tumour nodule <input type="checkbox"/><br>Confluent nodules <input type="checkbox"/><br>Plaque <input type="checkbox"/><br>Thickening <input type="checkbox"/><br>Scarring <input type="checkbox"/><br>Adhesion <input type="checkbox"/><br>Normal peritoneum <input type="checkbox"/> | 0 <input type="checkbox"/><br>1 <input type="checkbox"/><br>2 <input type="checkbox"/><br>3 <input type="checkbox"/> |
| 12 | Distal ileum <input type="checkbox"/><br>Distal ileum <input type="checkbox"/>                                                                                          | Tumour nodule <input type="checkbox"/><br>Confluent nodules <input type="checkbox"/><br>Plaque <input type="checkbox"/><br>Thickening <input type="checkbox"/><br>Scarring <input type="checkbox"/><br>Adhesion <input type="checkbox"/><br>Normal peritoneum <input type="checkbox"/> | 0 <input type="checkbox"/><br>1 <input type="checkbox"/><br>2 <input type="checkbox"/><br>3 <input type="checkbox"/> |
|    | Total                                                                                                                                                                   |                                                                                                                                                                                                                                                                                        |                                                                                                                      |

## Key points

- Each structure is considered only in one region. For e.g., a large omental cake may extend beyond region 0, but should be scored only in region 0
  - When assigning the lesion score, the score of the structure bearing the largest tumor deposit should be considered and the morphology of that lesion scored
- 
- The morphological features are defined as follows
    1. **Tumor nodule** : Elevated mass with a round or irregular appearance
    2. **Confluent nodules**: More than one nodule in a region with the intervening peritoneum showing abnormalities like smaller nodules or thickening. Alternatively, when the edges of discrete nodules become confluent.
    3. **Plaque**: Elevated mass with a flat surface
    4. **Thickening**: Thickened peritoneum without any of the above changes
    5. **Scarring**- Lesion that has the appearance of scar tissue
    6. **Adhesion**- Presence of adhesions between viscera or any viscera and the parietal peritoneum
    7. **Normal peritoneum**- Absence of any of the changes described above
