# Supplementary material for: Patterns of peritoneal dissemination and response to systemic chemotherapy in common and rare peritoneal tumors treated by cytoreductive surgery: Study protocol of a prospective, multi-center, observational study
Source: bioRxiv or medRxiv preprint supplement (doi:10.1101/2021.04.01.21254760), 2021-04-07
Supplement: Supplementary file [file media-4.pdf]

## Supplement 4

### Pathological PCI

Select the structure with the largest tumor deposit in the region, select the type of lesion and the score (any one in each column)

| Region | Structure                                                                                                                                                                                                                                                                                                                                          | Morphology (select any one)                                                                                                                                                                                        | Lesion score                                                                                                         |
|--------|----------------------------------------------------------------------------------------------------------------------------------------------------------------------------------------------------------------------------------------------------------------------------------------------------------------------------------------------------|--------------------------------------------------------------------------------------------------------------------------------------------------------------------------------------------------------------------|----------------------------------------------------------------------------------------------------------------------|
| 0      | Midline incision <input type="checkbox"/><br>Anterior parietal peritoneum <input type="checkbox"/><br>Greater omentum <input type="checkbox"/><br>Omental cake <input type="checkbox"/><br>Transverse colon <input type="checkbox"/><br>Gastrocolic ligament <input type="checkbox"/><br>Transverse mesocolon <input type="checkbox"/>             | Tumour nodule <input type="checkbox"/><br>Clustering of nodules <input type="checkbox"/><br>Thickening <input type="checkbox"/><br>Scarring <input type="checkbox"/><br>Normal peritoneum <input type="checkbox"/> | 0 <input type="checkbox"/><br>1 <input type="checkbox"/><br>2 <input type="checkbox"/><br>3 <input type="checkbox"/> |
| 1      | Right hepatic lobe surface <input type="checkbox"/><br>Diaphragm <input type="checkbox"/><br>Foramen of Winslow <input type="checkbox"/><br>Gallbladder <input type="checkbox"/><br>Hepatorenal recess <input type="checkbox"/>                                                                                                                    | Tumour nodule <input type="checkbox"/><br>Clustering of nodules <input type="checkbox"/><br>Thickening <input type="checkbox"/><br>Scarring <input type="checkbox"/><br>Normal peritoneum <input type="checkbox"/> | 0 <input type="checkbox"/><br>1 <input type="checkbox"/><br>2 <input type="checkbox"/><br>3 <input type="checkbox"/> |
| 2      | Left hepatic lobe surface <input type="checkbox"/><br>Lesser omentum <input type="checkbox"/><br>Hepatic hilum <input type="checkbox"/><br>Falciform ligament <input type="checkbox"/>                                                                                                                                                             | Tumour nodule <input type="checkbox"/><br>Clustering of nodules <input type="checkbox"/><br>Thickening <input type="checkbox"/><br>Scarring <input type="checkbox"/><br>Normal peritoneum <input type="checkbox"/> | 0 <input type="checkbox"/><br>1 <input type="checkbox"/><br>2 <input type="checkbox"/><br>3 <input type="checkbox"/> |
| 3      | Surface of spleen <input type="checkbox"/><br>Left diaphragmatic peritoneum <input type="checkbox"/><br>Tail of pancreas and hilum of the spleen <input type="checkbox"/><br>Anterior and posterior stomach surfaces <input type="checkbox"/>                                                                                                      | Tumour nodule <input type="checkbox"/><br>Clustering of nodules <input type="checkbox"/><br>Thickening <input type="checkbox"/><br>Scarring <input type="checkbox"/><br>Normal peritoneum <input type="checkbox"/> | 0 <input type="checkbox"/><br>1 <input type="checkbox"/><br>2 <input type="checkbox"/><br>3 <input type="checkbox"/> |
| 4      | Left colon <input type="checkbox"/><br>Left paracolic gutter <input type="checkbox"/><br>Left mesocolon <input type="checkbox"/>                                                                                                                                                                                                                   | Tumour nodule <input type="checkbox"/><br>Clustering of nodules <input type="checkbox"/><br>Thickening <input type="checkbox"/><br>Scarring <input type="checkbox"/><br>Normal peritoneum <input type="checkbox"/> | 0 <input type="checkbox"/><br>1 <input type="checkbox"/><br>2 <input type="checkbox"/><br>3 <input type="checkbox"/> |
| 5      | Left pelvic peritoneum <input type="checkbox"/><br>Secondary root of the mesosigmoid <input type="checkbox"/><br>Sigmoid colon <input type="checkbox"/>                                                                                                                                                                                            | Tumour nodule <input type="checkbox"/><br>Clustering of nodules <input type="checkbox"/><br>Thickening <input type="checkbox"/><br>Scarring <input type="checkbox"/><br>Normal peritoneum <input type="checkbox"/> | 0 <input type="checkbox"/><br>1 <input type="checkbox"/><br>2 <input type="checkbox"/><br>3 <input type="checkbox"/> |
| 6      | Uterus <input type="checkbox"/><br>Left Fallopian tube <input type="checkbox"/><br>Right Fallopian tube <input type="checkbox"/><br>Left ovary <input type="checkbox"/><br>Right ovary <input type="checkbox"/><br>Bladder <input type="checkbox"/><br>Pouch of Douglas <input type="checkbox"/><br>Rectosigmoid junction <input type="checkbox"/> | Tumour nodule <input type="checkbox"/><br>Clustering of nodules <input type="checkbox"/><br>Thickening <input type="checkbox"/><br>Scarring <input type="checkbox"/><br>Normal peritoneum <input type="checkbox"/> | 0 <input type="checkbox"/><br>1 <input type="checkbox"/><br>2 <input type="checkbox"/><br>3 <input type="checkbox"/> |
| 7      | Right pelvic peritoneum <input type="checkbox"/><br>Cecum <input type="checkbox"/>                                                                                                                                                                                                                                                                 | Tumour nodule <input type="checkbox"/><br>Clustering of nodules <input type="checkbox"/>                                                                                                                           | 0 <input type="checkbox"/><br>1 <input type="checkbox"/>                                                             |

|    |                                                                                                                                     |                                                                                                                                                                                                                    |                                                                                                                      |
|----|-------------------------------------------------------------------------------------------------------------------------------------|--------------------------------------------------------------------------------------------------------------------------------------------------------------------------------------------------------------------|----------------------------------------------------------------------------------------------------------------------|
|    | Appendix <input type="checkbox"/><br>Mesoappendix <input type="checkbox"/>                                                          | Thickening <input type="checkbox"/><br>Scarring <input type="checkbox"/><br>Normal peritoneum <input type="checkbox"/>                                                                                             | 2 <input type="checkbox"/><br>3 <input type="checkbox"/>                                                             |
| 8  | Right colon <input type="checkbox"/><br>Right paracolic gutter <input type="checkbox"/><br>Right mesocolon <input type="checkbox"/> | Tumour nodule <input type="checkbox"/><br>Clustering of nodules <input type="checkbox"/><br>Thickening <input type="checkbox"/><br>Scarring <input type="checkbox"/><br>Normal peritoneum <input type="checkbox"/> | 0 <input type="checkbox"/><br>1 <input type="checkbox"/><br>2 <input type="checkbox"/><br>3 <input type="checkbox"/> |
| 9  | Proximal jejunum <input type="checkbox"/><br>Proximal mesojejunum <input type="checkbox"/>                                          | Tumour nodule <input type="checkbox"/><br>Clustering of nodules <input type="checkbox"/><br>Thickening <input type="checkbox"/><br>Scarring <input type="checkbox"/><br>Normal peritoneum <input type="checkbox"/> | 0 <input type="checkbox"/><br>1 <input type="checkbox"/><br>2 <input type="checkbox"/><br>3 <input type="checkbox"/> |
| 10 | Distal jejunum <input type="checkbox"/><br>Distal mesojejunum <input type="checkbox"/>                                              | Tumour nodule <input type="checkbox"/><br>Clustering of nodules <input type="checkbox"/><br>Thickening <input type="checkbox"/><br>Scarring <input type="checkbox"/><br>Normal peritoneum <input type="checkbox"/> | 0 <input type="checkbox"/><br>1 <input type="checkbox"/><br>2 <input type="checkbox"/><br>3 <input type="checkbox"/> |
| 11 | Proximal ileum <input type="checkbox"/><br>Proximal mesoileum <input type="checkbox"/>                                              | Tumour nodule <input type="checkbox"/><br>Clustering of nodules <input type="checkbox"/><br>Thickening <input type="checkbox"/><br>Scarring <input type="checkbox"/><br>Normal peritoneum <input type="checkbox"/> | 0 <input type="checkbox"/><br>1 <input type="checkbox"/><br>2 <input type="checkbox"/><br>3 <input type="checkbox"/> |
| 12 | Distal ileum <input type="checkbox"/><br>Distal ileum <input type="checkbox"/>                                                      | Tumour nodule <input type="checkbox"/><br>Clustering of nodules <input type="checkbox"/><br>Thickening <input type="checkbox"/><br>Scarring <input type="checkbox"/><br>Normal peritoneum <input type="checkbox"/> | 0 <input type="checkbox"/><br>1 <input type="checkbox"/><br>2 <input type="checkbox"/><br>3 <input type="checkbox"/> |
|    | Total                                                                                                                               |                                                                                                                                                                                                                    |                                                                                                                      |

### Key points

- Each structure is considered only in one region. For e.g., a large omental cake may extend beyond region 0, but should be scored only in region 0
  - When assigning the lesion score, the score of the structure bearing the largest tumor deposit should be considered and the morphology of that lesion scored. The morphology is based on the findings of gross examination
- 
- The morphological features are defined as follows
    1. **Tumor nodule** : Elevated mass with a round or irregular appearance
    2. **Clustering of nodules**: More than one nodule in a region with the intervening peritoneum showing abnormalities like smaller nodules or thickening. Alternatively, when the edges of discrete nodules become confluent.
    3. **Scarring**- Lesion that has the appearance of scar tissue
    4. **Adhesion**- Presence of adhesions between viscera or any viscera and the parietal peritoneum
    5. **Normal peritoneum**- Absence of any of the changes described above
